# Supplementary material for: Expression of Progenitor Cell Markers in the Glial-Like Cells of Epiretinal Membranes of Different Origins
Source: Hindawi journal article supplement (doi:10.1155/2018/7096326), 2018-12-27

# Supplemental Fig.1

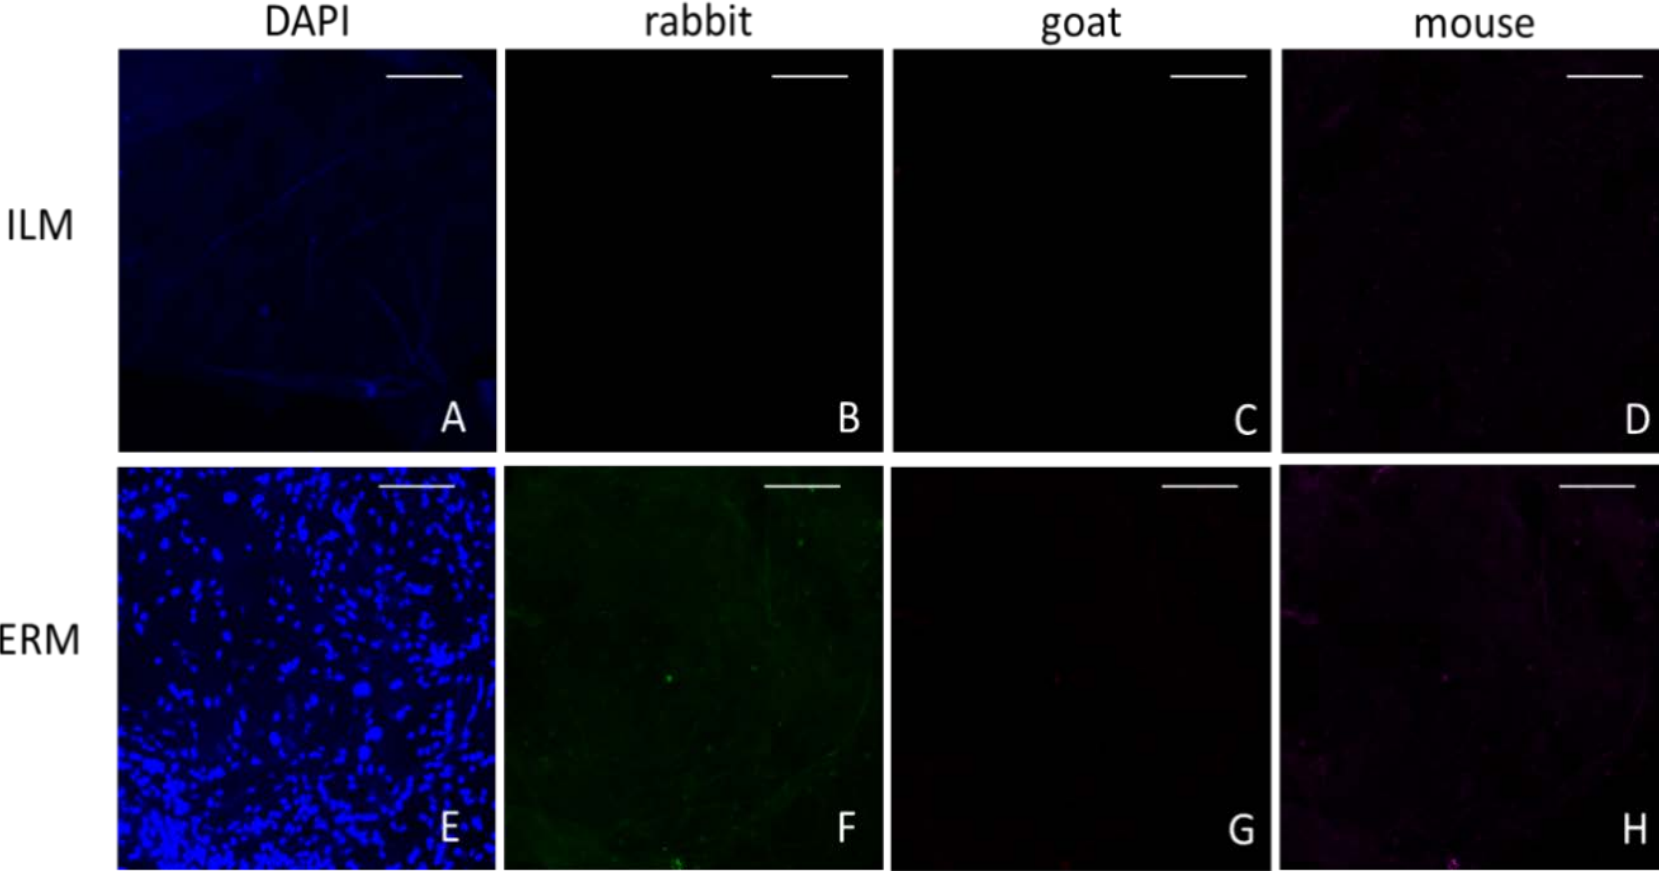

Supplement: f1 [file 7096326.f1.pdf]
